# Supplementary material
Source: MDPI journal article supplement (https://www.mdpi.com/1424-2818/15/2/298)
Supplement: s1 [file s1]

# Supplementary Materials.

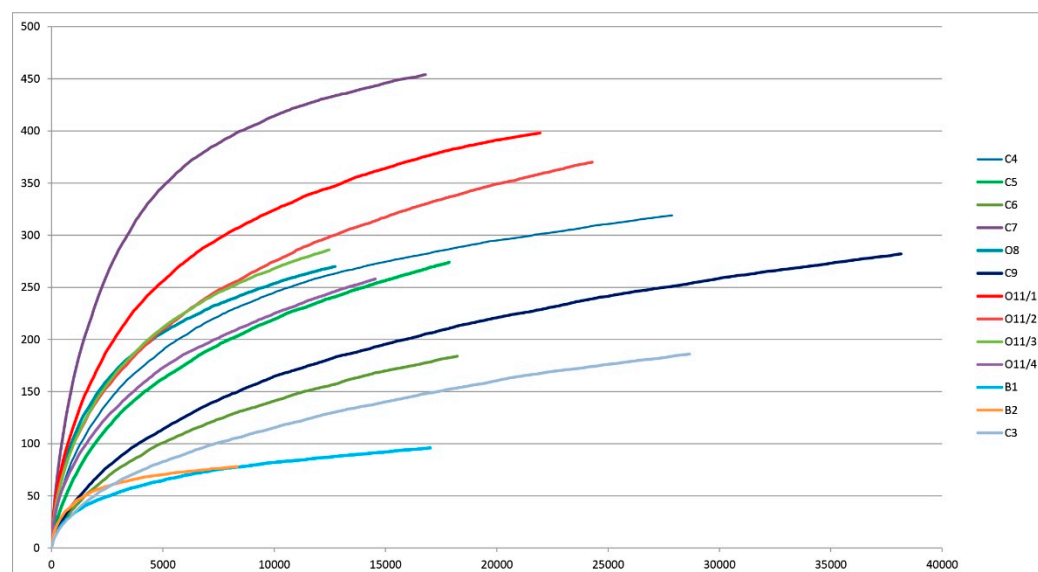

**Figure S1.** Rarefaction curves plotting the number observed OTUs as a function of the number of sequences defined at genetic distance level of 0.03.

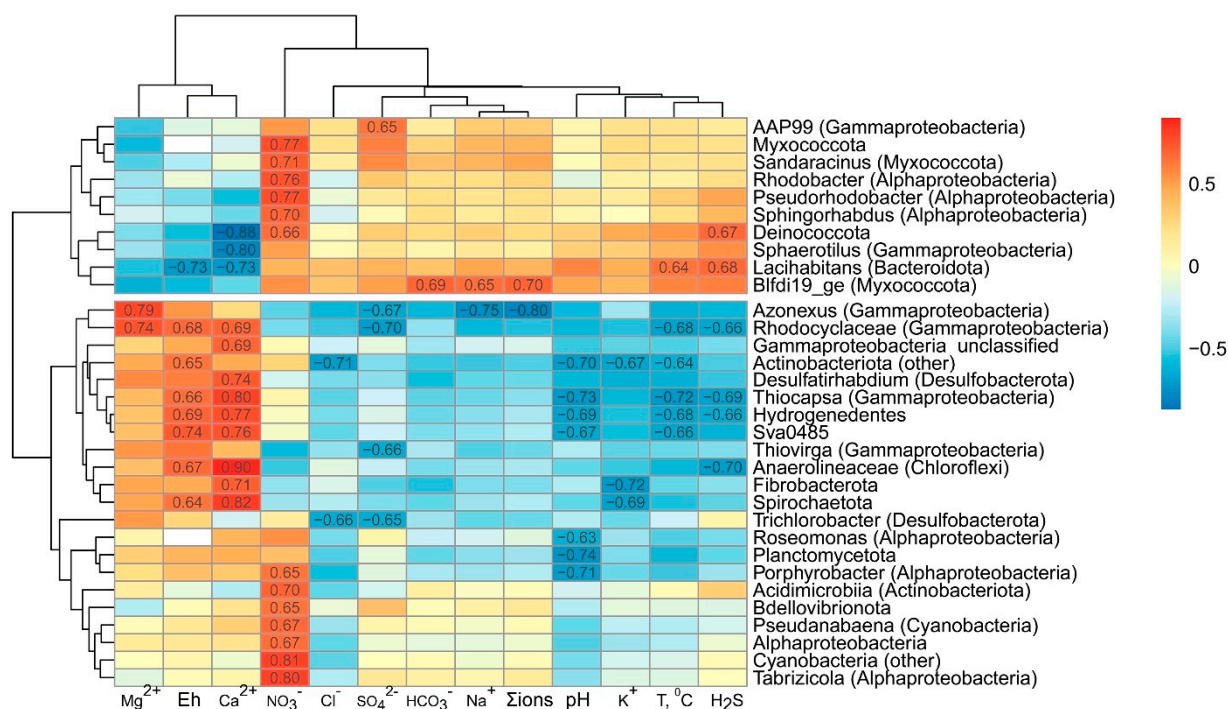

**Figure S2.** A heat map (with Spearman's rank correlation coefficient) showing correlation between dominant OTUs (97% identity) with abiotic factors. Colors indicate the  $r$  values of Spearman's rank correlation coefficient. The influence of a factor was assumed to be reliable if the  $p$ -value of the Spearman statistics was  $< 0.05$ .

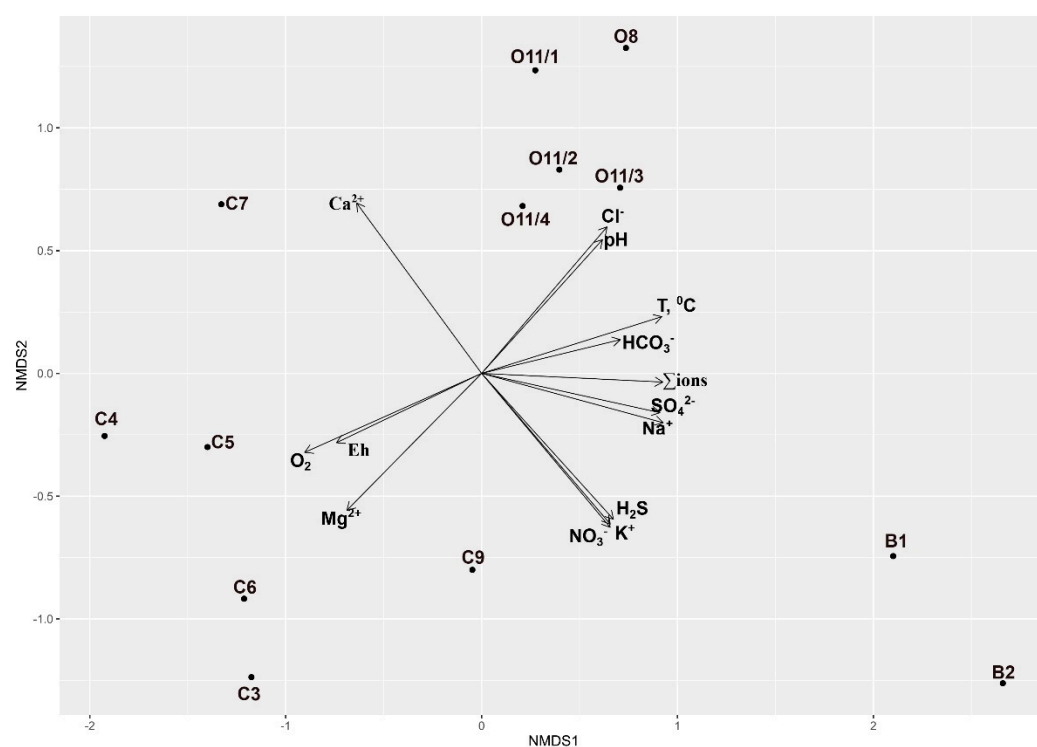

**Figure S3.** Non-metric multidimensional scaling (NMDS) based on Bray-Curtis dissimilarities shows relationships between the relative bacterial abundance of each sample and environmental parameters.

**Table S1.** Physical and chemical parameters of water in Zmeevaya bay (concentration of ion-mg/l).

| site | T, °C | pH  | Eh, mB | HCO <sub>3</sub> <sup>-</sup> | Cl <sup>-</sup> | NO <sub>3</sub> <sup>-</sup> | SO <sub>4</sub> <sup>2-</sup> | Na <sup>+</sup> | K <sup>+</sup> | Ca <sup>2+</sup> | Mg <sup>2+</sup> | NH <sub>4</sub> <sup>+</sup> |
|------|-------|-----|--------|-------------------------------|-----------------|------------------------------|-------------------------------|-----------------|----------------|------------------|------------------|------------------------------|
| B1   | 42.6  | 9.6 | -441   | 87                            | 23              | 6.2                          | 130                           | 120             | 2.8            | 1.8              | 0.01             | -                            |
| B2   | 39.0  | 9.2 | -442.6 | 103                           | 27              | 7.9                          | 150                           | 132             | 3.2            | 3.1              | 0.01             | -                            |
| C3   | 18.8  | 8.5 | -230   | 47.2                          | 0.51            | 0.14                         | 8.90                          | 2.50            | 0.90           | 13.1             | 0.98             | 0.06                         |
| C4   | 18.5  | 8.4 | -152.7 | 81.3                          | 0.35            | 0.06                         | 6.86                          | 4.70            | 0.60           | 20.0             | 1.36             | 0.06                         |
| C5   | 19.4  | 8.9 | -198.8 | 75.7                          | 21.4            | 0.00                         | 60.9                          | 40.9            | 1.20           | 18.8             | 0.61             | 0.34                         |
| C6   | 23.8  | 9.1 | -420   | 71.9                          | 5.48            | 0.00                         | 7.06                          | 15.0            | 1.20           | 11.5             | 1.90             | 0.22                         |
| C7   | 18.0  | 8.3 | -231   | 59.0                          | 3.71            | 0.19                         | 16.2                          | 2.60            | 0.70           | 20.5             | 1.23             | 0.10                         |
| O8   | 32.9  | 9.6 | -360   | 84.1                          | 27.8            | 0.00                         | 60.5                          | 51.7            | 1.20           | 16.1             | 0.05             | 0.14                         |
| C9   | 21.6  | 9.0 | -285   | 86.4                          | 14.8            | 0.00                         | 43.6                          | 36.4            | 2.80           | 15.2             | 0.98             | 0.26                         |
| O11  | 32.3  | 9.6 | -426   | 84.0                          | 20.5            | 0.00                         | 56.5                          | 51.1            | 1.20           | 16.1             | 0.06             | -                            |
| C12  | 19.1  | 7.8 | +150   | 69.0                          | 0.26            | 0.00                         | 5.21                          | 3.40            | 1.00           | 16.3             | 2.98             | 0.01                         |

"-" not measured.

**Table S2.** Total and unique OTUs in samples.

| Sample                                         | Number of OTU | unique OTU      |
|------------------------------------------------|---------------|-----------------|
| B1 B2 O11/1-O11/4<br>O8 C3-C9<br>(all samples) | 1             | Otu0004         |
| B1 O11/1-O11/4 B2<br>C5-C9                     | 1             | Otu0016         |
| B1 O11/1-O11/4 C3-<br>C9 O8                    | 2             | Otu0009 Otu0001 |

|                                                       |    |                                                                                                                                                                                                                                                                                                                                                                                                                                                                                                                                                                                                                     |
|-------------------------------------------------------|----|---------------------------------------------------------------------------------------------------------------------------------------------------------------------------------------------------------------------------------------------------------------------------------------------------------------------------------------------------------------------------------------------------------------------------------------------------------------------------------------------------------------------------------------------------------------------------------------------------------------------|
| O11/1-O11/4 O8 B2<br>C3-C9                            | 1  | Otu0050                                                                                                                                                                                                                                                                                                                                                                                                                                                                                                                                                                                                             |
| B1 O11/1-O11/4 B2 3<br>4 6 O8 9                       | 1  | Otu0003                                                                                                                                                                                                                                                                                                                                                                                                                                                                                                                                                                                                             |
| O11/1-O11/4 3 4 5 6 7<br>8 9<br>(II and III clusters) | 6  | Otu0026 Otu0005 Otu0103 Otu0071 Otu0037 Otu0023                                                                                                                                                                                                                                                                                                                                                                                                                                                                                                                                                                     |
| B1 O11/1-O11/4 C7                                     | 1  | Otu0466                                                                                                                                                                                                                                                                                                                                                                                                                                                                                                                                                                                                             |
| O11/1-O11/4                                           | 32 | Otu0101 Otu0244 Otu0225 Otu0110 Otu0362 Otu0077<br>Otu0138 Otu0263 Otu0090 Otu0398 Otu0594 Otu0095<br>Otu0204 Otu0403 Otu0510 Otu0047 Otu0763 Otu0250<br>Otu0328 Otu0134 Otu0091 Otu0028 Otu0142 Otu0684<br>Otu0088 Otu0048 Otu0069 Otu0259 Otu0113 Otu0059<br>Otu0066 Otu0122                                                                                                                                                                                                                                                                                                                                      |
| B1 B2 (I cluster)                                     | 19 | Otu0271 Otu0184 Otu0786 Otu0541 Otu0378 Otu0388<br>Otu0273 Otu0175 Otu0380 Otu0757 Otu0821 Otu0677<br>Otu0806 Otu0369 Otu0660 Otu0385 Otu0342 Otu0604<br>Otu0042                                                                                                                                                                                                                                                                                                                                                                                                                                                    |
| C3 C4 C5 C6 C7 C9<br>(III cluster)                    | 13 | Otu0171 Otu0077 Otu0008 Otu0214 Otu0037 Otu0479<br>Otu0180 Otu0132 Otu0085 Otu0091 Otu0014 Otu0079<br>Otu0066                                                                                                                                                                                                                                                                                                                                                                                                                                                                                                       |
| B1                                                    | 6  | Otu0526 Otu0653 Otu0248 Otu0524 Otu0642 Otu0613                                                                                                                                                                                                                                                                                                                                                                                                                                                                                                                                                                     |
| B2                                                    | 24 | Otu0106 Otu0482 Otu0356 Otu0625 Otu0163 Otu0861<br>Otu0877 Otu0192 Otu0648 Otu0654 Otu0460 Otu0859<br>Otu0559 Otu0326 Otu0781 Otu0390 Otu0236 Otu0249<br>Otu0632 Otu0463<br>Otu0361 Otu0578 Otu0773 Otu0890                                                                                                                                                                                                                                                                                                                                                                                                         |
| C3                                                    | 3  | Otu0716 Otu0844 Otu0562                                                                                                                                                                                                                                                                                                                                                                                                                                                                                                                                                                                             |
| C4                                                    | 33 | Otu0680 Otu0579 Otu0915 Otu0508 Otu0817 Otu0690<br>Otu0522 Otu0568 Otu0804 Otu0182 Otu0649 Otu0893<br>Otu0694 Otu0668 Otu0764 Otu0387 Otu0516 Otu0547<br>Otu0575 Otu0874 Otu0790 Otu0691 Otu0285 Otu0481<br>Otu0419 Otu0777 Otu0112 Otu0565 Otu0891 Otu0855<br>Otu0379 Otu0529 Otu0836                                                                                                                                                                                                                                                                                                                              |
| C5                                                    | 5  | Otu0738 Otu0735 Otu0538 Otu0742 Otu0682                                                                                                                                                                                                                                                                                                                                                                                                                                                                                                                                                                             |
| C6                                                    | 4  | Otu0500 Otu0672 Otu0818 Otu0372                                                                                                                                                                                                                                                                                                                                                                                                                                                                                                                                                                                     |
| C7                                                    | 78 | Otu0302 Otu0381 Otu0517 Otu0918 Otu0506 Otu0509<br>Otu0888 Otu0798 Otu0871 Otu0674<br>Otu0849 Otu0614 Otu0878 Otu0917 Otu0488 Otu0916<br>Otu0611 Otu0433 Otu0760 Otu0643<br>Otu0177 Otu0869 Otu0492 Otu0750 Otu0431 Otu0921<br>Otu0805 Otu0770 Otu0696 Otu0346 Otu0771 Otu0569<br>Otu0525 Otu0595 Otu0548 Otu0329 Otu0769 Otu0181<br>Otu0797 Otu0857 Otu0896 Otu0438 Otu0897 Otu0731<br>Otu0826 Otu0628 Otu0904 Otu0809 Otu0724 Otu0655<br>Otu0829 Otu0608 Otu0707 Otu0720 Otu0093 Otu0440<br>Otu0747 Otu0437 Otu0444 Otu0834<br>Otu0503 Otu0808 Otu0486 Otu0693 Otu0860 Otu0528<br>Otu0854 Otu0609 Otu0848 Otu0485 |

|       |    |                                                                                                                                                                                                                                     |
|-------|----|-------------------------------------------------------------------------------------------------------------------------------------------------------------------------------------------------------------------------------------|
|       |    | Otu0851 Otu0281 Otu0551 Otu0839 Otu0384 Otu0353<br>Otu0845 Otu0675                                                                                                                                                                  |
| O11/1 | 27 | Otu0152 Otu0350 Otu0465 Otu0688 Otu0635 Otu0908<br>Otu0534 Otu0858 Otu0572 Otu0820 Otu0391 Otu0886<br>Otu0532 Otu0796 Otu0843 Otu0912 Otu0646 Otu0557<br>Otu0374 Otu0683 Otu0772 Otu0733 Otu0801 Otu0748<br>Otu0902 Otu0765 Otu0411 |
| O11/2 | 2  | Otu0706 Otu0697                                                                                                                                                                                                                     |
| O11/3 | 5  | Otu0307 Otu0741 Otu0421 Otu0624 Otu0665                                                                                                                                                                                             |
| O11/4 | 2  | Otu0767 Otu0318                                                                                                                                                                                                                     |
